# Supplementary material
Source: PubMed Central journal article supplement (PMC4372069)
Supplement: cn500206a_si_001.pdf [file cn500206a_si_001.pdf]

## Supporting information

### Characterization of novel cannabinoid based T-type calcium channel blockers with analgesic effects.

Chris Bladen<sup>1</sup>, Steven W. McDaniel<sup>2</sup>, Vinicius M. Gadotti<sup>1</sup>, Ravil R. Petrov<sup>2</sup>, N. Daniel Berger<sup>1</sup>, Philippe Diaz<sup>2</sup> and Gerald W. Zamponi<sup>1</sup>

<sup>1</sup>Department of Physiology & Pharmacology, Hotchkiss Brain Institute, Cumming School of Medicine, University of Calgary, Canada.

<sup>2</sup>Core Laboratory for Neuromolecular Production, The University of Montana, Missoula, MT, USA.

#### **Corresponding Authors:**

For biology: Dr. Gerald W. Zamponi, Mailing address: Department of Physiology & Pharmacology, Cumming School of Medicine, University of Calgary, 3330 Hospital Drive NW, Calgary, Canada T2N 4N1. Telephone.[403] 220-8687. E-mail: [zamponi@ucalgary.ca](mailto:zamponi@ucalgary.ca)

For chemistry: P.Diaz: phone: (406) 243-4362; fax: (406) 243-5228; E-mail: [Philippe.diaz@umontana.edu](mailto:Philippe.diaz@umontana.edu).

#### Contents

|                                                                                                                                                     |    |
|-----------------------------------------------------------------------------------------------------------------------------------------------------|----|
| <sup>1</sup> H-NMR of <i>N</i> -((1-(2-( <i>tert</i> -butylamino)-2-oxoethyl)piperidin-4-yl)methyl)-9-pentyl-9H-carbazole-3-carboxamide (9) .....   | S2 |
| <sup>1</sup> H-NMR of <i>N</i> - <i>tert</i> -butyl-2-[4-(9-pentyl-9H-carbazole-3-carbonyl)piperazin-1-yl]acetamide (10) .....                      | S2 |
| <sup>1</sup> H-NMR of <i>N</i> -((1-(2-( <i>tert</i> -butylamino)-2-oxoethyl)piperidin-4-yl)methyl)-9-propyl-9H-carbazole-3-carboxamide (13) .....  | S3 |
| <sup>1</sup> H-NMR of <i>N</i> -((1-(2-( <i>tert</i> -butylamino)-2-oxoethyl)piperidin-4-yl)methyl)-9-butyl-9H-carbazole-3-carboxamide (16) .....   | S3 |
| <sup>1</sup> H-NMR of <i>N</i> -((1-(2-( <i>tert</i> -butylamino)-2-oxoethyl)pyrrolidin-4-yl)methyl)-9-pentyl-9H-carbazole-3-carboxamide (19) ..... | S4 |
| <sup>1</sup> H-NMR of <i>N</i> -{[1-(3,3-dimethylbutyl)piperidin-4-yl]methyl}-9-pentyl-9H-carbazole-3-carboxamide (20) .....                        | S4 |
| LC/MS analyses .....                                                                                                                                | S5 |

<sup>1</sup>H-NMR of *N*-((1-(2-(tert-butylamino)-2-oxoethyl)piperidin-4-yl)methyl)-9-pentyl-9H-carbazole-3-carboxamide (9)

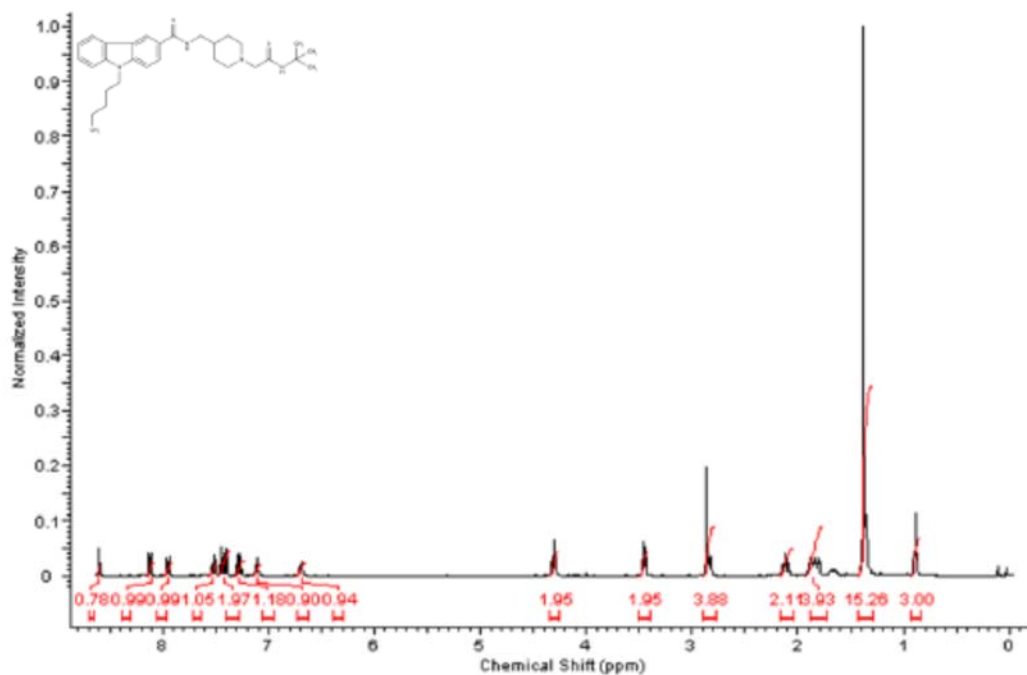

<sup>1</sup>H-NMR of *N*-tert-butyl-2-[4-(9-pentyl-9H-carbazole-3-carbonyl)piperazin-1-yl]acetamide (10)

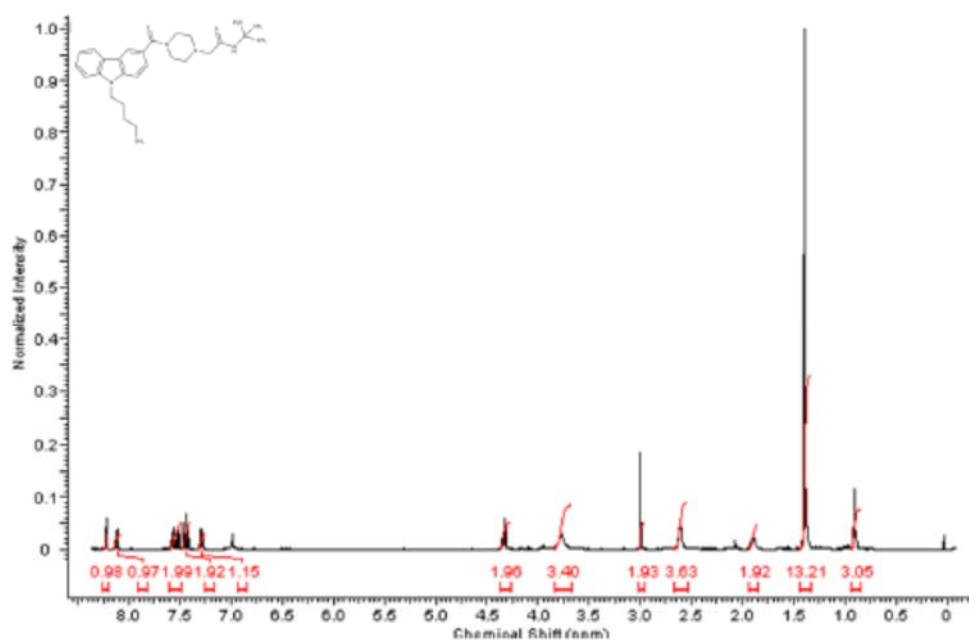

$^1\text{H-NMR}$  of *N*-((1-(2-(tert-butylamino)-2-oxoethyl)piperidin-4-yl)methyl)-9-propyl-9H-carbazole-3-carboxamide (13)

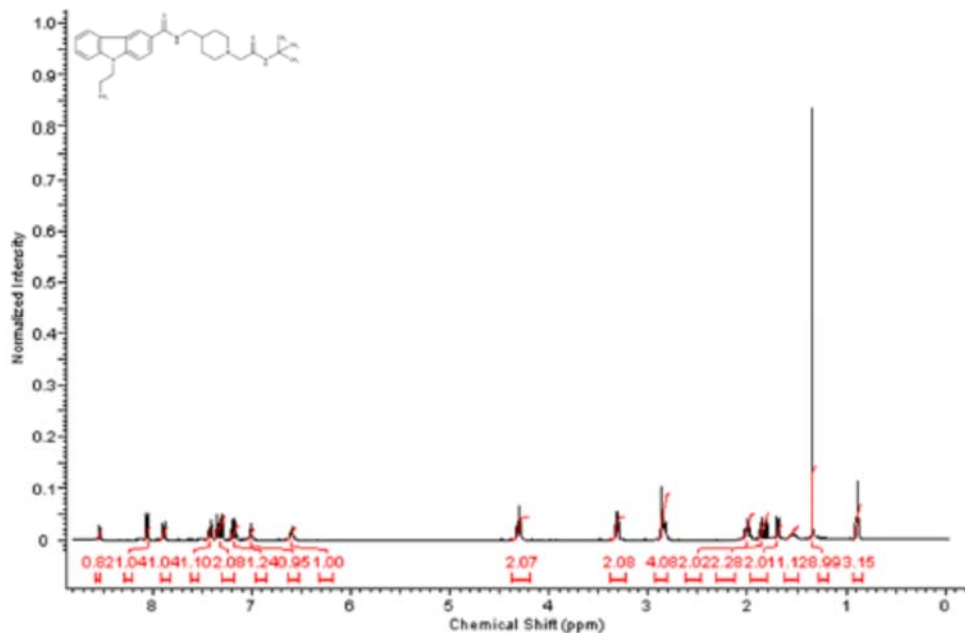

$^1\text{H-NMR}$  of *N*-((1-(2-(tert-butylamino)-2-oxoethyl)piperidin-4-yl)methyl)-9-butyl-9H-carbazole-3-carboxamide (16)

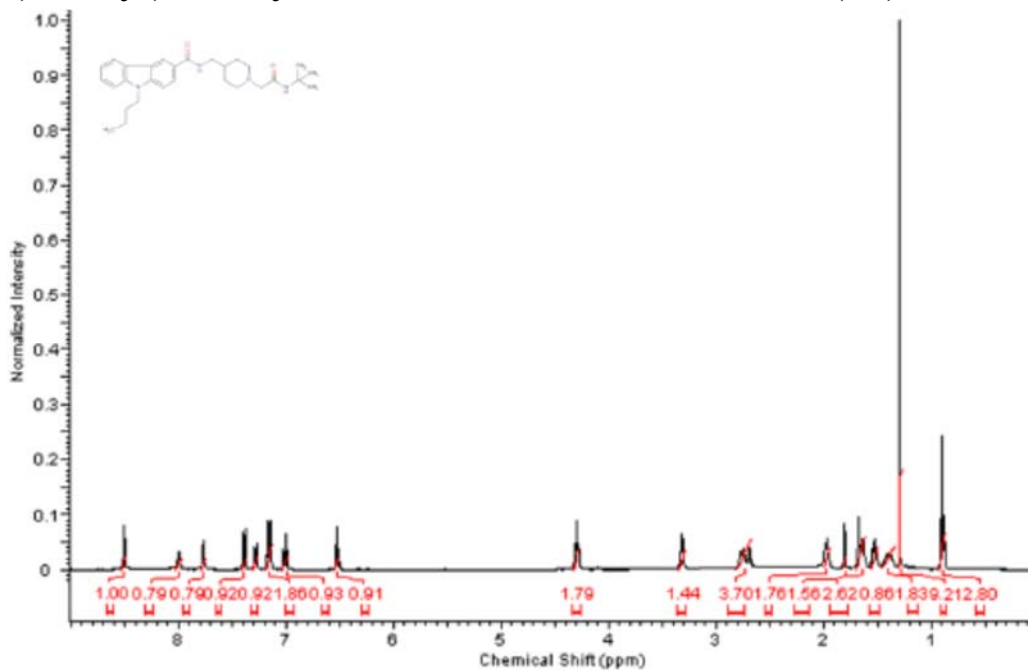

$^1\text{H-NMR}$  of *N*-((1-(2-(*tert*-butylamino)-2-oxoethyl)pyrrolidin-4-yl)methyl)-9-pentyl-9*H*-carbazole-3-carboxamide (19)

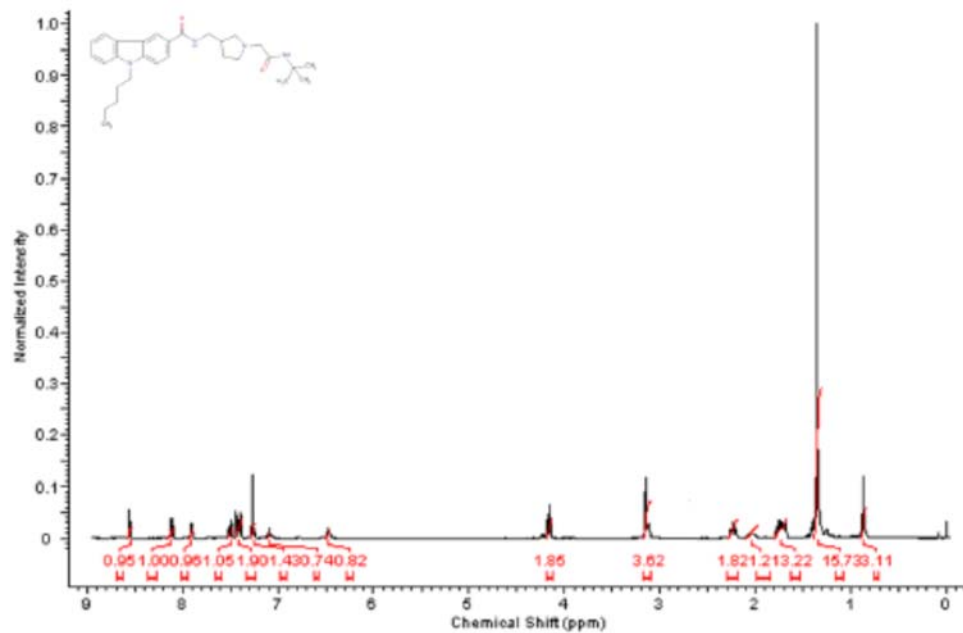

$^1\text{H-NMR}$  of *N*-{[1-(3,3-dimethylbutyl)piperidin-4-yl]methyl}-9-pentyl-9*H*-carbazole-3-carboxamide (20)

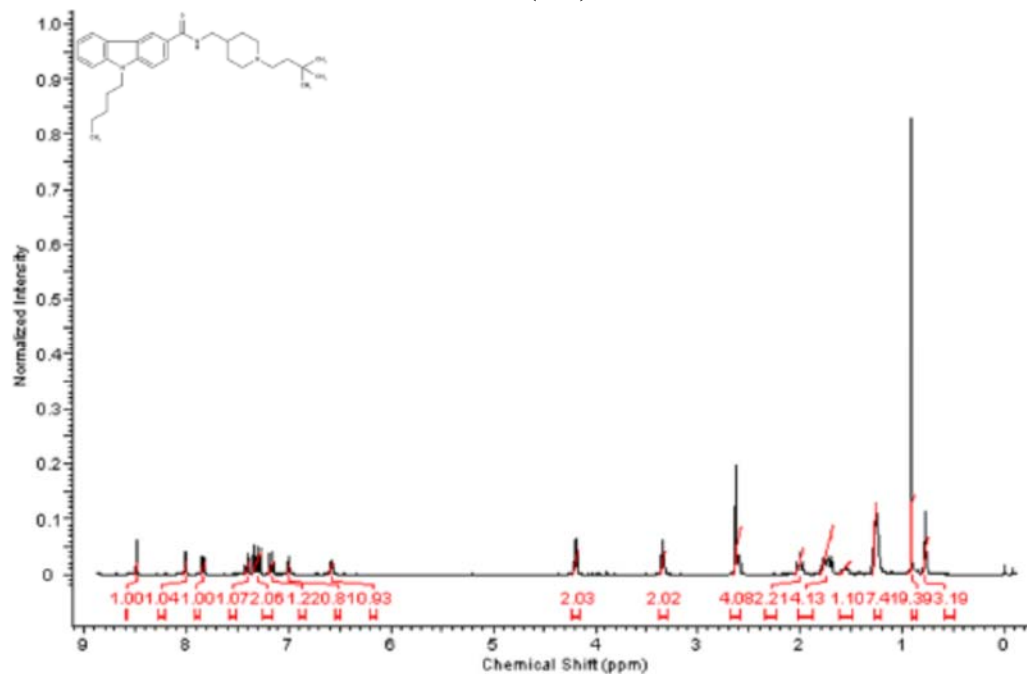

## LC/MS analyses

LC/MS analyses were obtained on a Waters ACQUITY UPLC-series liquid chromatography system equipped with a diode array detector and a Waters Quattro Premier Tandem Quadrupole mass spectrometer (ionization type electrospray). The liquid chromatography conditions were as follows: a Waters ACQUITY UPLC column (BEH, C18, 1.7  $\mu$ m, 1.0x100 mm) was used, and it was eluted with a gradient made up of two solvent mixtures. Solvent A consisted of water and 0.2% formic acid. Solvent B consisted of methanol. The gradient was processed as follows:

| Time (min) | Flow (ml/min) | %A   | %B   |
|------------|---------------|------|------|
| Initial    | 0.200         | 90.0 | 10.0 |
| 1.00       | 0.200         | 90.0 | 10.0 |
| 8.00       | 0.200         | 5.0  | 95.0 |
| 12.00      | 0.200         | 5.0  | 95.0 |
| 12.10      | 0.200         | 90.0 | 10.0 |
| 15.00      | 0.200         | 90.0 | 10.0 |

Compound purity was assigned on the basis of 254-nM detection data assessed by comparing relative peak areas of the signals.

| Compound | Molecular weight | MW+H <sup>+</sup> | Purity (%) | Retention Time (min) |
|----------|------------------|-------------------|------------|----------------------|
| 16       | 477.32           | 477.32            | 98         | 9.33                 |
| 13       | 463.31           | 463.31            | 96         | 9.12                 |
| 19       | 477.33           | 477.32            | 97         | 9.01                 |
| 10       | 463.28           | 463.31            | 96         | 8.47                 |
| 9        | 491.34           | 491.34            | 98         | 6.35                 |
| 20       | 462.35           | 462.35            | 96         | 8.12                 |
